# Supplementary material for: Chinese herbal foot baths as a new strategy for diabetic foot with Wagner grade of 0 or 1: a meta-analysis and data mining
Source: Front Pharmacol. 2025 Jul 10;16:1594386. doi: 10.3389/fphar.2025.1594386 (PMC12287017; doi:10.3389/fphar.2025.1594386)
Supplement: Supplementary file 1 [file Table1.xlsx]

## Sheet: S1
Supplementary Table S1 Search strategies and results for all databases.
Database	Search strategy	Filter	Limits	Results
CNKI	TKA=((足浴+熏洗+熏蒸)*(糖尿病足+糖尿病坏疽+糖尿病肢端坏疽))	-	-	548
VIP	M=(("足浴"+"熏洗"+"熏蒸")*("糖尿病足"+"糖尿病坏疽"+"糖尿病肢端坏疽"))	-	-	487
Wanfang	主题: (("足浴" OR "熏洗" OR "熏蒸") AND ("糖尿病足" OR "糖尿病坏疽" OR "糖尿病肢端坏疽"))	-	-	707
Sinomed	("足浴"[核心字段:智能] OR "熏洗"[核心字段:智能] OR "熏蒸"[核心字段:智能]) AND ("糖尿病足"[核心字段:智能] OR "糖尿病坏疽"[核心字段:智能] OR "糖尿病肢端坏疽"[核心字段:智能])	-	-	495
PubMed	(Foot Bath[Title/Abstract] OR Fumigation[Title/Abstract] OR Fumigations[Title/Abstract] OR Washing[Title/Abstract] OR Steaming[Title/Abstract] OR Lavipeditum[Title/Abstract]) AND (Diabetic Foot[Title/Abstract] OR Diabetic Feet[Title/Abstract] OR Diabetes Foot[Title/Abstract] OR Diabetes Feet[Title/Abstract])	-	-	39
Embase	('foot bath':ab,ti OR fumigation:ab,ti OR fumigations:ab,ti OR washing:ab,ti OR steaming:ab,ti OR lavipeditum:ab,ti) AND ('diabetic foot':ab,ti OR 'diabetic feet':ab,ti OR 'diabetes foot':ab,ti OR 'diabetes feet':ab,ti)	-	-	63
Cochrane Library	Foot Bath OR Fumigation OR Fumigations OR Washing OR Steaming OR Lavipeditum in Title Abstract Keyword AND Diabetic Foot OR Diabetic Feet OR Diabetes Foot OR Diabetes Feet in Title Abstract Keyword	-	-	211
Web of Science	Foot Bath OR Fumigation OR fumigation OR Washing OR Steaming OR latipedium (Topic) and Diabetic Foot OR Diabetic Feet OR Diabetes Foot OR Diabetes Feet	-	-	122
WHO ICTRP	((Foot Bath OR Fumigation OR Fumigations OR Washing OR Steaming OR Lavipeditum) AND (Diabetic Foot OR Diabetic Feet OR Diabetes Foot OR Diabetes Feet))	-	-	46
ClinicalTrials.gov	((Foot Bath OR Fumigation OR Fumigations OR Washing OR Steaming OR Lavipeditum) AND (Diabetic Foot OR Diabetic Feet OR Diabetes Foot OR Diabetes Feet))	-	-	42
CNKI, China National Knowledge Infrastructure; VIP, China Science and Technology Journal Database; WHO-ICTRP, World Health Organization International Clinical Trial Registration Platform.

## Sheet: S2
Supplementary Table S2 Components, dosage, and parameters of Chinese herbal foot-baths.
Study ID	Components [Chinese name (Latin name)] (dosage/g)	Parameters
Chen Y 2014	Zi Cao [Arnebia euchroma (Royle ex Benth.) I.M.Johnst.] 50 g, Dang Gui [Angelica sinensis (Oliv.) Diels] 50 g, Bai Zhi [Angelica dahurica (Fisch. ex Hoffm.) Benth. & Hook. f. ex Franch. & Sav.] 40 g, Gan Cao [Glycyrrhiza uralensis Fisch.] 40 g	38°C–42°C, 30 min each time, twice a day, 60 consecutive days
Ding L 2016	Xi Xin [Asarum heterotropoides Fr. Schmidtvar. mandshuricum (Maxim.) Kitag.] 3 g, Chuan Xiong [Conioselinum anthriscoides 'Chuanxiong'] 9 g, Niu Xi [Achyranthes bidentata Blume] 9 g, Bai Zhi [Angelica dahurica (Fisch. ex Hoffm.) Benth. & Hook. f. ex Franch. & Sav.] 9 g, Gui Zhi [Cinnamomum cassia Presl] 9 g, Cao Wu [Aconitum kusnezoffii Rchb.] 9 g, Wei Ling Xian [Clematis chinensis Osbeck] 9 g, F…	35°C–45℃, liquid level 20cm above ankle joint, 30 min each time, once a day, 2 consecutive weeks
Gao BB 2018	Luo Shi Teng [Trachelospermum jasminoides (Lindl.) Lem.] 32 g, Ji Xue Teng [Spatholobussuberectus Dunn] 32 g, Hai Feng Teng [Piper kadsura (Choisy) Ohwi] 30 g, Gou Teng [Uncaria rhynchophylla (Miq.) Miq.] 28 g, Wei Ling Xian [Clematis chinensis Osbeck] 30 g, Hong Hua [Carthamus tinctorius L.] 18 g, Lu Lu Tong [Liquidambar formosana Hance] 28 g, Dan Shen [Salvia miltiorrhiza Bunge] 20 g, Tao Ren […	38°C–42℃, 30 min each time, once a night, 4 consecutive weeks
Gao CY 2009	Dang Gui [Angelica sinensis (Oliv.) Diels], Chuan Xiong [Conioselinum anthriscoides 'Chuanxiong'], Chi Shao [Paeonia lactiflora Pall.], Shu Di Huang [Rehmannia glutinosa (Gaertn.) Libosch. ex DC.], Tao Ren [Prunus persica (L.) Batsch], Hong Hua [Carthamus tinctorius L.], Gui Zhi [Cinnamomum cassia Presl], Di Long [Pheretima aspergillum (E. Perrier)], Dan Shen [Salvia miltiorrhiza Bunge], Yan Hu S…	Steam feets for 5–10 minutes and soak at 40°C for 15–20 min, liquid level 5–10cm above ankle joint, once a day, 60 consecutive days
Huang HX 2014	Tou Gu Cao [Speranskia tuberculata (Bunge) Baill.] 100 g, Chuan Xiong [Conioselinum anthriscoides 'Chuanxiong'] 100 g, Hong Hua [Carthamus tinctorius L.] 100 g, Ru Xiang [Boswellia serrata Roxb.] 100 g, MoYao [Commiphora myrrha (T.Nees) Engl.] 100 g, Dan Shen [Salvia miltiorrhiza Bunge] 100 g	40℃, liquid level 10cm above ankle joint, 30 min each time, once a day, 2 consecutive weeks
Huang XH 2015	Huang Po [Phellodendron chinense C.K.Schneid.] 20 g, Di Yu [Sanguisorba officinalis L.] 20 g, Ma Chi Xian [Portulaca oleracea L.] 20 g, Pu Gong Ying [Taraxacum mongolicum Hand.-Mazz.] 20 g, Zi Hua Di Ding [Viola philippica Cav.] 20 g, Yu Xing Cao [Houttuynia cordata Thunb.] 20 g, Ban Bian Lian [Lobelia chinensis Lour.] 20 g, Alunite [KAl(SO₄)₂·12H₂O and NH₄Al(SO₄)₂·12H₂O] 20 g, Ai Ye [Artemisia a…	40℃, 20 min each time, twice a day, 4 weeks as a course of treatment
Jiang Y 2018	Tao Ren [Prunus persica (L.) Batsch, Prunus davidiana (Carr.) Franch.] 10 g, Hong Hua [Carthamus tinctorius L.] 10 g, Shu Di Huang [Rehmannia glutinosa (Gaertn.) Libosch. ex DC.] 10 g, Bai Shao [Paeonia lactiflora Pall.] 10 g, Chi Shao [Paeonia lactiflora Pall.] 10 g, Dang Gui [Angelica sinensis (Oliv.) Diels] 10 g, Chuan Xiong [Conioselinum anthriscoides 'Chuanxiong'] 10 g, Gui Zhi [Cinnamomum c…	40–45℃, 30 min each time, twice a day, 60 days as a course of treatment
Liu J 2016	Shui Zhi [Whitm.ania Pigra Whitman] 15 g, Chi Shao [Paeonia lactiflora Pall.] 15 g, Dang Gui [Angelica sinensis (Oliv.) Diels] 10 g, Tao Ren [Prunus persica (L.) Batsch] 10 g, Da Huang [Rheum palmatum L.] 10 g, Shu Di Huang [Rehmannia glutinosa (Gaertn.) Libosch. ex DC.] 10 g, Ge Gen [Pueraria montana var. lobata (Willd.) Maesen & S.M.Almeida ex Sanjappa & Predeep] 10 g, Zhi Mu [Anemarrhena aspho…	36°C–40℃, liquid level 8–10cm above ankle joint, 30 min each time, once a day, 40 consecutive days
Su JH 2012	Dang Gui [Angelica sinensis (Oliv.) Diels] 25 g, Di Huang [Rehmannia glutinosa (Gaertn.) Libosch. ex DC.] 20 g, Chuan Xiong [Conioselinum anthriscoides 'Chuanxiong']20 g, Chi Shao [Paeonia lactiflora Pall.] 30 g, Niu Xi [Achyranthes bidentata Blume] 25 g, Tou Gu Cao [Speranskia tuberculata (Bunge) Baill.] 25 g, Gui Zhi [Cinnamomum cassia Presl] 20 g, Xi Xin [Asarum heterotropoides Fr. Schmidtvar.…	38°C–40℃, 20 min each time, twice a day, 4 consecutive weeks
Zhang SF 2011	Huang Qi [Astragalus mongholicus Bunge], Tao Ren [Prunus persica (L.) Batsch], Hong Hua [Carthamus tinctorius L.], Tian Ma [Gastrodia elata Blume], Ai Ye [Artemisia argyi Levl. et Vant.], Gui Zhi [Cinnamomum cassia Presl], Zhi Mu [Anemarrhena asphodeloides Bunge], Huang Bai [Phellodendron chinense C.K.Schneid.], Fang Feng [Saposhnikovia divaricata (Turcz. ex Ledeb.) Schischk.], She Chuang Zi [Cni…	20 min each time, once every other day, 12 consecutive weeks
Zhang ZM 2018	Ji Xue Teng [Spatholobus suberectus Dunn] 30 g, Du Huo [Heracleum hemsleyanum Diels] 15 g, Sang Ji Sheng [Taxillus sutchuenensis (Lecomte) Danser] 15 g, Qin Jiao [Gentiana macrophylla Pall.] 15 g, Chuan Xiong [Conioselinum anthriscoides 'Chuanxiong'] 15 g, Du Zhong [Eucommia ulmoides Oliv.] 15 g,, Niu Xi [Achyranthes bidentata Blume] 15 g,, Xu Duan [Dipsacus asper Wall. ex DC.] 20 g,, Fang Feng […	37°C–42℃, 30 min each time, once a night, 4 weeks as a course of treatment
Zhou N 2011	Da Huang [Rheum palmatum L.] 40 g, Huang Bai [Phellodendron chinense C.K.Schneid.] 20 g, Ma Bo [Calvatia lilacina (Mont. et Berk.) Lloyd.] 20 g, Alunite [KAl(SO₄)₂·12H₂O and NH₄Al(SO₄)₂·12H₂O] 15 g, Mao Dong Qing [Ilex pubescens Hook. & Arn.] 20 g, Gui Zhi [Cinnamomum cassia Presl] 20 g	40℃, liquid level 10cm above ankle joint, 20 min each time, once a day, 12 consecutive weeks
Zhou WG 2015	Hai Feng Teng [Piper kadsura (Choisy) Ohwi] 30 g, Luo Shi Teng [Trachelospermum jasminoides (Lindl.) Lem.] 30 g, Gou Teng [Uncaria rhynchophylla (Miq.) Miq.] 30 g, Ji Xue Teng [Spatholobus suberectus Dunn] 30 g, Wei Ling Xian [Clematis chinensis Osbeck] 30 g, Lu Lu Tong [Liquidambar formosana Hance] 30 g, Tao Ren [Prunus persica (L.) Batsch] 20 g, Hong Hua [Carthamus tinctorius L.] 20 g, Dan Shen…	38°C–42℃, 30 min each time, once a day, 4 consecutive weeks as a course of treatment

## Sheet: S3
Supplementary Table S3 Pharmacological effects of high-frequency Chinese herbal medicine used in the prescriptions (frequency ≥ 30%).
No.	Chinese herb	Scientific name	Pharmacological effects	References	Frequency/%
1	Cinnamomi Ramulus (Gui Zhi, 桂枝)	Cinnamomum cassia Presl	Anti-inflammatory, immunoregulatory, antineoplastic, neuroprotective, antioxidant, improving cardiovascular functions, anti-angiogenic action, antiviral, vasorelaxant, inhibits adipocyte differentiation, and contraction smooth muscle	doi: 10.1016/j.jep.2023.116747. doi: 10.1002/mnfr.202200768. doi: 10.3389/fphar.2023.1121799. doi: 10.3390/molecules28052015. doi: 10.1155/2022/6060677. doi: 10.1016/j.phymed.2022.154047. doi: 10.1016/j.phymed.2021.153794. doi: 10.1080/14786419.2017.1299724. doi: 10.1142/S0192415X11009263. doi: 10.3109/13880209.2013.772211. doi: 10.1155/2014/280204.	69.23
2	Chuanxiong Rhizoma (Chuan Xiong, 川芎)	Conioselinum anthriscoides 'Chuanxiong'	Immunoregulatory, improving ferroptosis, antihyperuricaemic, anti-inflammatory, microcirculation improvement, inhibit intestinal contraction, antidepressant, anti-liver fibrosis, anti-cholestatic activity, antithrombotic, and antineoplastic	doi: 10.1038/s41598-024-82486-5. doi: 10.1016/j.fitote.2025.106456. doi: 10.1016/j.jep.2024.118608. doi: 10.1016/j.fitote.2024.106087. doi: 10.1016/j.chmed.2023.07.003. doi: 10.1016/S1875-5364(23)60416-9. doi: 10.3390/molecules28186702. doi: 10.7759/cureus.40499.	46.15
3	Carthami Flos (Hong Hua, 红花)	Carthamus tinctorius L.	Antiviral, anticoagulation, anti-inflammatory, antioxidant, anti-inflammation, improve endothelial function, anti-thrombosis, and anti-cell apoptosis	doi: 10.1038/s41598-022-15338-9. doi: 10.1002/jssc.202100092. doi: 10.1080/13880209.2022.2136209. doi: 10.1016/j.jep.2022.115656. doi: 10.1016/j.jep.2023.117615. PMID: 32185985.	46.15
4	Persicae Semen (Tao Ren, 桃仁)	Prunus persica (L.) Batsch	Antioxidant, anticoagulant, anti-atherosclerotic, neuroprotective, anti-hepatic fibrosis, anti-inflammatory, anti-tumor, immunomodulatory, promote fracture healing, protect spermatogenesis, and improves microcirculatory	doi: 10.3390/ijms25168580. doi: 10.1007/s11655-024-3815-4. doi: 10.1016/j.phymed.2022.154018. doi: 10.3390/ijms24087388. doi: 10.1111/aji.12627. doi: 10.1016/j.jcma.2017.09.005.	46.15
5	Angelicae Sinensis Radix (Dang Gui, 当归)	Angelica sinensis (Oliv.) Diels	Anti-inflammation, anti-oxidative stress, angiogenesis, neurogenesis, anti-platelet aggregation, anti-atherosclerosis, protection of vessels, anti-fibrosis, regulating autophagy, and anti-tumor	doi: 10.1016/j.phymed.2021.153652. doi: 10.1016/S1875-5364(21)60026-2. doi: 10.1016/j.psj.2022.102415. doi: 10.4103/cjop.CJOP-D-23-00024.	38.46
6	Asari Radix Et Rhizoma (Xi Xin, 细辛)	Asarum heterotropoides F.Schmidt	Anti-inflammatory and analgesic	doi: 10.1016/j.jep.2022.115569.	38.46
7	Salviae Miltiorrhizae Radix (Dan Shen, 丹参)	Salvia miltiorrhiza Bunge	Cardioprotective, enhancing erectile function, anti-osteoporosis, anti-inflammatory, mitigating cold-induced immunosuppression, and anti-tumor	doi: 10.1016/j.ijbiomac.2025. doi: 10.3390/nu17010024. doi: 10.3389/fphar.2024.1483431. doi: 10.1016/j.phytochem.2024.114300. doi: 10.3390/ijms25179432. doi: 10.1177/15347354241258961.	30.77
8	Paeoniae Radix Rubra (Chi Shao, 赤芍)	Paeonia lactiflora Pall.	Antioxidant, cardiovascular-protective, anti-depressive, neuroprotective, anti-tumor, hepatoprotective, anti-inflammatory, regulating immunity, and analgesic	doi: 10.3389/fphar.2024.1447959. doi: 10.1002/cbdv.202401119. doi: 10.1016/j.jep.2023.116567. doi: 10.3892/ijmm.2024.5384. doi: 10.1097/MD.0000000000040796. doi: 10.1016/j.jep.2020.112913.	30.77
